# Supplementary material for: Dysregulation of the haem-haemopexin axis is associated with severe malaria in a case–control study of Ugandan children
Source: PubMed Central journal article supplement (PMC4687388; doi:10.1186/s12936-015-1028-1), 2015-12-21

**A)**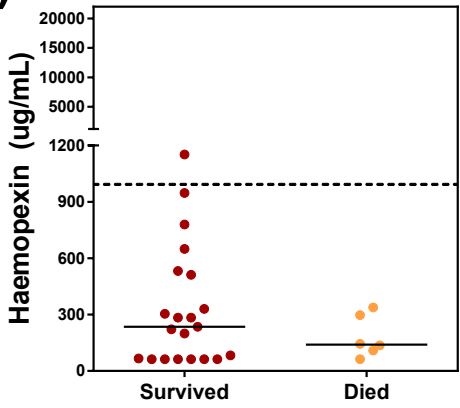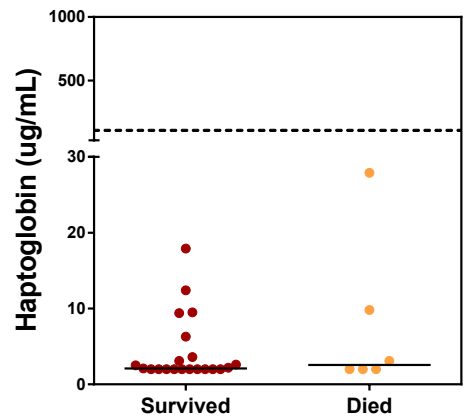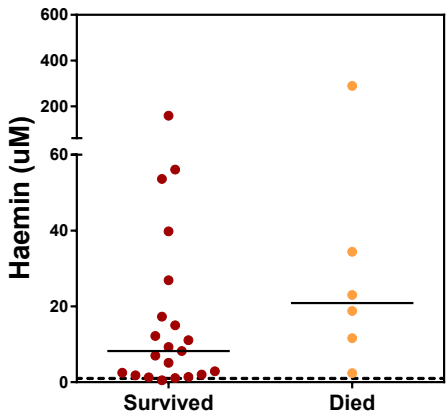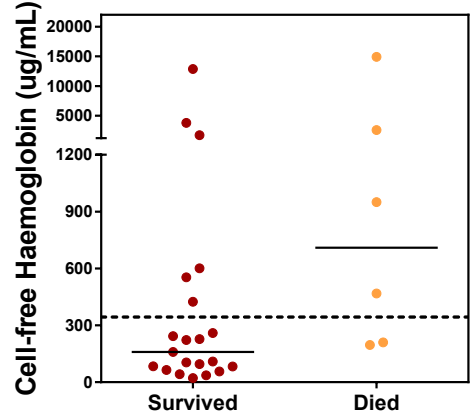**B)**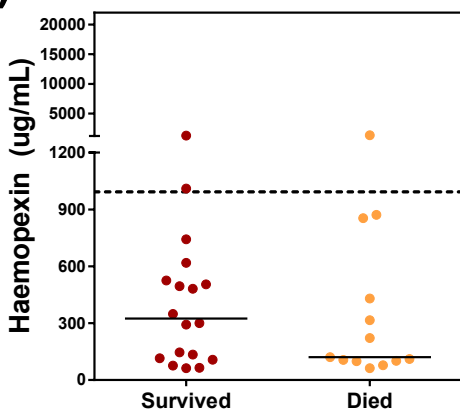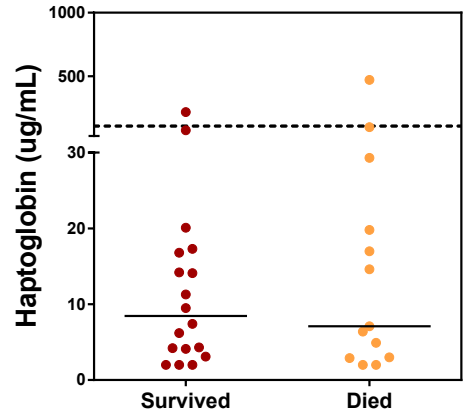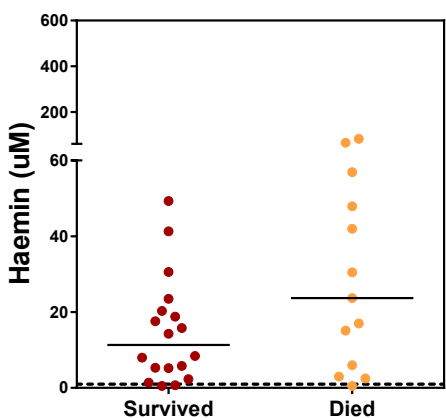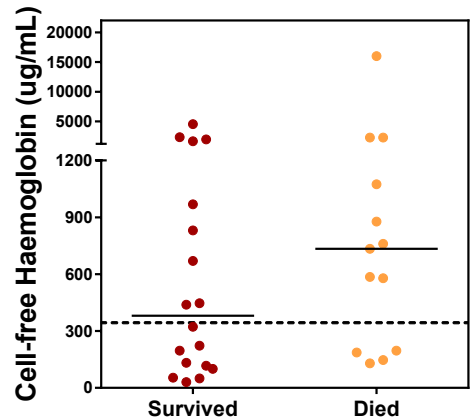

Supplement: 12936_2015_1028_MOESM1_ESM.pdf [file 12936_2015_1028_MOESM1_ESM.pdf]
